# Supplementary material for: Factors Associated with Participation of Community-Dwelling Older Adults in a Home-Based Falls Prevention Program
Source: MDPI journal article supplement (doi:10.3390/ijerph16061087), 2019-03-26
Supplement: s1 [file s1]

## Supplementary Materials

**Table S1.** Baseline characteristics of completers and drop-outs of the home-based exercise program, and differences between both groups.

|                                                  | Completers<br>(n=195)           | Drop-outs<br>(n=43)             | Difference<br>between<br>completers and<br>drop-outs* |
|--------------------------------------------------|---------------------------------|---------------------------------|-------------------------------------------------------|
| <b>Demographic characteristics</b>               | <i>n (%)</i>                    | <i>n (%)</i>                    | <i>p-value</i>                                        |
| Female                                           | 140 (72)                        | 29 (67)                         | 0.57                                                  |
| Age - mean $\pm$ SD                              | 80.9 $\pm$ 6.6                  | 82.2 $\pm$ 6.9                  | 0.24                                                  |
| Living alone                                     | 124 (64)                        | 27 (63)                         | 0.92                                                  |
| Education                                        |                                 |                                 |                                                       |
| low                                              | 53 (27)                         | 17 (40)                         | 0.11                                                  |
| middle                                           | 108 (55)                        | 22 (51)                         | 0.62                                                  |
| high                                             | 34 (17)                         | 4 (9)                           | 0.19                                                  |
| <b>Health-related outcomes</b>                   | <i>mean <math>\pm</math> SD</i> | <i>mean <math>\pm</math> SD</i> | <i>p-value</i>                                        |
| Quality of life (EQ-5D + cognition) <sup>1</sup> | 0.65 $\pm$ 0.24                 | 0.61 $\pm$ 0.23                 | 0.35                                                  |
| Elevated fall risk - n (%)                       | 133 (69) <sup>a</sup>           | 28 (65)                         | 0.60                                                  |
| Mobility (TUG) in seconds                        | 16.9 $\pm$ 8.9 <sup>b</sup>     | 17.8 $\pm$ 9.8 <sup>d</sup>     | 0.58                                                  |
| Concern about falling (Short FES-I)              | 9.8 $\pm$ 3.9                   | 9.7 $\pm$ 4.7                   | 0.84                                                  |
| Self-management (SMAS-S) <sup>2</sup>            | 60.1 $\pm$ 16.0 <sup>c</sup>    | 55.4 $\pm$ 16.5                 | 0.08                                                  |
| General health (SF-20) <sup>3</sup>              |                                 |                                 |                                                       |
| physical functioning                             | 45.1 $\pm$ 31.6 <sup>c</sup>    | 45.0 $\pm$ 32.4                 | 0.98                                                  |
| role functioning                                 | 29.2 $\pm$ 41.1                 | 26.7 $\pm$ 42.7                 | 0.72                                                  |
| social functioning                               | 74.5 $\pm$ 32.7                 | 63.7 $\pm$ 38.6                 | 0.10                                                  |
| mental health                                    | 73.2 $\pm$ 20.8 <sup>c</sup>    | 72.3 $\pm$ 20.5                 | 0.79                                                  |
| current health perceptions                       | 46.9 $\pm$ 21.1 <sup>c</sup>    | 44.1 $\pm$ 21.4                 | 0.43                                                  |
| pain                                             | 31.9 $\pm$ 27.8                 | 37.8 $\pm$ 26.9                 | 0.21                                                  |

SD: Standard deviation; <sup>1</sup>: Mean scores range from 0 (death) to 1 (full health); <sup>2</sup>: Scores range from 0-100, a higher score means better self-management abilities; <sup>3</sup>: Scores range from 0-100, a higher score means better functioning, and for pain, a higher score means a higher degree of pain; <sup>a</sup>: n=192; <sup>b</sup>: n=178, as seventeen participants were not able to do the test; <sup>c</sup>: n=194; <sup>d</sup>: n=39, as four participants were not able to do the test; \*: Independent samples t-test for continuous variables, Chi-squared test for dichotomous variables. A p-value <0.05 is considered a statistically significant difference.

**Table S2.** Baseline and follow-up health-related outcomes of individuals frequently participating in the home-based exercise program.

|                                                  | <b>Baseline<br/>frequent<br/>participation<br/>(n=102)</b> | <b>Follow-up<br/>frequent<br/>participation<br/>(n=102)</b> |
|--------------------------------------------------|------------------------------------------------------------|-------------------------------------------------------------|
| <b>Health-related outcomes</b>                   | <i>mean ± SD</i>                                           | <i>mean ± SD</i>                                            |
| Quality of life (EQ-5D + cognition) <sup>1</sup> | 0.70 ± 0.23                                                | 0.70 ± 0.26 <sup>c</sup>                                    |
| Elevated fall risk - n (%)                       | 65 (64) <sup>a</sup>                                       |                                                             |
| Mobility (TUG) in seconds                        | 16.2 ± 7.9 <sup>b</sup>                                    | 16.9 ± 9.1 <sup>d</sup>                                     |
| Concern about falling (Short FES-I)              | 9.9 ± 3.6                                                  | 9.9 ± 4.3 <sup>c</sup>                                      |
| Self-management (SMAS-S) <sup>2</sup>            | 63.8 ± 14.9                                                | 61.6 ± 14.5                                                 |
| General health (SF-20) <sup>3</sup>              |                                                            |                                                             |
| physical functioning                             | 50.2 ± 32.0                                                | 51.7 ± 31.1 <sup>e</sup>                                    |
| role functioning                                 | 34.3 ± 43.9                                                | 36.3 ± 42.3                                                 |
| social functioning                               | 76.3 ± 32.5                                                | 73.9 ± 33.4                                                 |
| mental health                                    | 74.1 ± 20.8 <sup>a</sup>                                   | 75.1 ± 20.8                                                 |
| current health perceptions                       | 47.1 ± 20.5                                                | 49.0 ± 19.4 <sup>c</sup>                                    |
| pain                                             | 35.8 ± 27.1                                                | 36.0 ± 26.7                                                 |

SD: Standard deviation; <sup>1</sup>: Mean scores range from 0 (death) to 1 (full health); <sup>2</sup>: Scores range from 0-100, a higher score means better self-management abilities; <sup>3</sup>: Scores range from 0-100, a higher score means better functioning, and for pain, a higher score means a higher degree of pain; <sup>a</sup>: n=101; <sup>b</sup>: n=96, as six participants were not able to do the test; <sup>c</sup>: n=101; <sup>d</sup>: n=82, as twenty participants were not able to do the test; <sup>e</sup>: n=100.
